# Supplementary material for: Reduced autophagy upon C9ORF72 loss synergizes with dipeptide repeat protein toxicity in G4C2 repeat expansion disorders
Source: PubMed Central journal article supplement — EMBO J. 2020 Jan 13;39(4):e100574. doi: 10.15252/embj.2018100574 (PMC7024836; doi:10.15252/embj.2018100574), 2020-01-13
Supplement: EMBJ-39-e100574-s001.pdf [file EMBJ-39-e100574-s001.pdf]

## Expanded View Figures

### Figure EV1. Expanded G4C2 repeats are translated into polyGA.

- A Scheme and sequence of the human *C9ORF72* sense transcript with 80 G4C2 repeats fused to the eGFP in the three possible frames and cloned into the pcDNA3.1 plasmid.
- B, C Fluorescence (B) and RT-qPCR (C) GFP analyses of HEK293 cells transfected for 24 h with 80 G4C2 repeats embedded in the human sense *C9ORF72* sequence and fused in all three possible frames with the GFP deleted of its ATG.
- D, E GFP expression (D) and immunoblotting (E) analysis of HEK293 cells transfected for 24 h with constructs expressing either polyGA, polyGP, or polyGR expressed under an artificial ATG start codon and fused to the GFP.
- F Immunoblotting against the GFP or the GAPDH of proteins extracted from HEK293 cells transfected for 24 h with either a wild-type or a mutant (CTG into CTT) construct containing 80 G4C2 repeats embedded in sense *C9ORF72* fused to the GFP in the GA frame.
- G Immunoblotting against the GFP or the GAPDH of proteins extracted from HEK293 cells transfected for 24 h with either a wild-type or a mutant (CTG into ATG) construct containing 80 G4C2 repeats embedded in sense *C9ORF72* fused to the GFP in the GA frame.
- H RT-qPCR analysis of GFP expression of HEK293 cells transfected for 24 h with either wild-type or mutant (CTG into CTT or ATG) constructs containing 80 G4C2 repeats embedded in sense *C9ORF72* fused to the GFP in the GA frame.
- I Immunoblotting against the HA-tag or the GAPDH of proteins extracted from HEK293 cells transfected for 24 h with 20 G4C2 repeats embedded in the human sense *C9ORF72* sequence fused to a HA-tag in the GA frame and treated or not with MG132 and/or bafilomycin A1 for 15 h.
- J RT-qPCR analysis of GFP expression of HEK293 cells transfected for 24 h with either wild-type or mutant (AGG into CGG) constructs containing 80 G4C2 repeats embedded in sense *C9ORF72* fused to the GFP in the GR frame.



**Figure EV2. Expanded C4G2 repeats are translated into polyPG.**

- A, B Fluorescence (A) and RT-qPCR (B) GFP analyses of HEK293 cells transfected for 24 h with 100 C4G2 repeats embedded in the human antisense *C9ORF72* sequence and fused in all three possible frames with the GFP deleted of its ATG.
- C, D GFP expression (C) and immunoblotting (D) analysis of HEK293 cells transfected for 24 h with constructs expressing either polyPA or polyPR expressed under an artificial ATG start codon and fused to the GFP. Fluorescence of ATG-polyGP from Fig EV1D is shown as control.
- E Immunoblotting against HA or the GAPDH of proteins extracted from HEK293 cells transfected for 24 h with either a wild-type or a mutant ( $\Delta$ ATG) construct containing 100 C4G2 repeats embedded in the antisense *C9ORF72* sequence fused to a HA-tag in the PG frame.
- F RT-qPCR GFP expression analysis of HEK293 cells transfected for 24 h with either a wild-type or a mutant ( $\Delta$ ATG) construct containing 100 C4G2 repeats embedded in the antisense *C9ORF72* sequence fused to the GFP in the PG frame.
- G Immunoblotting against the HA or the GAPDH of proteins extracted from HEK293 cells transfected for 24 h with either a wild-type or a Kozak consensus mutant construct containing 100 C4G2 repeats embedded in antisense *C9ORF72* fused to the HA-tag in the PG frame.
- H Immunoblotting against the HA-tag or the GAPDH of proteins extracted from HEK293 cells transfected for 24 h with 10 C4G2 repeats embedded in the human antisense *C9ORF72* sequence fused to a HA-tag in the PG frame and treated or not with MG132 and/or bafilomycin A1 for 15 h.

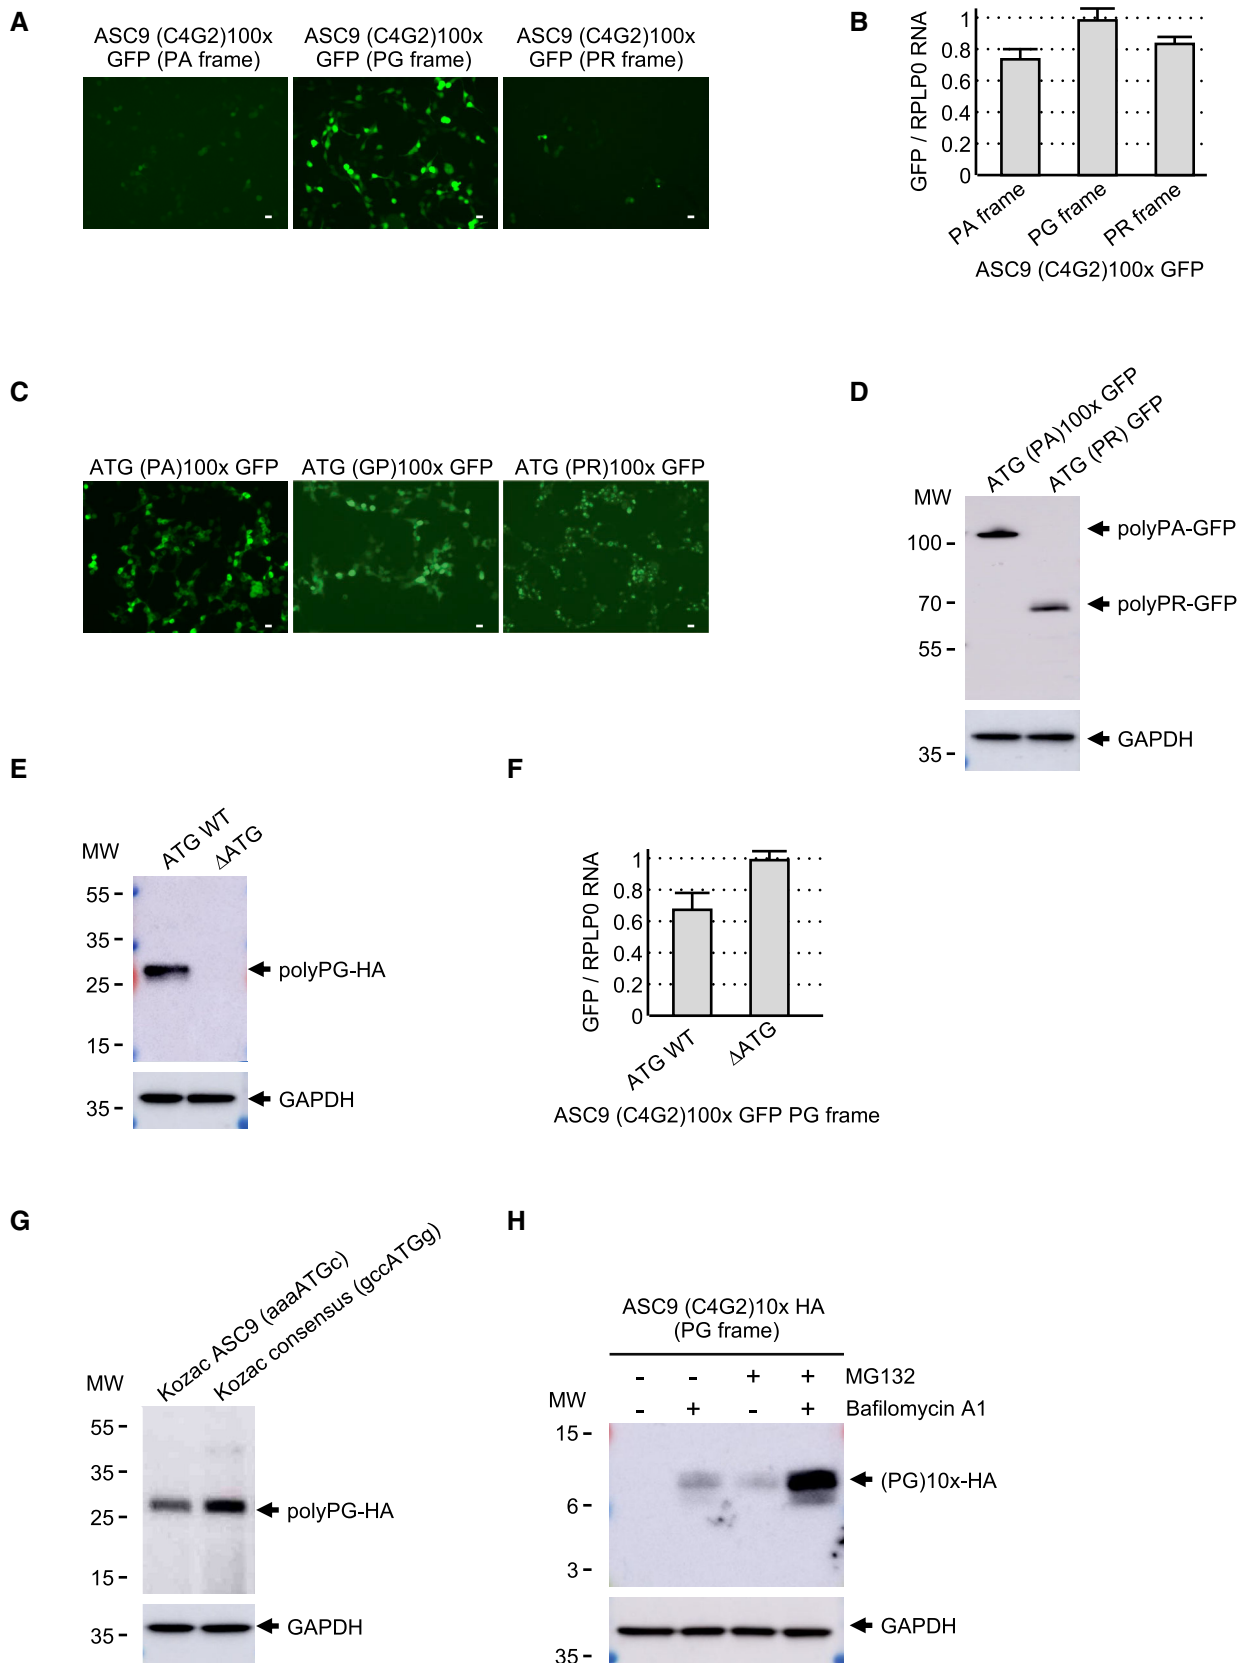

Figure EV2.

**Figure EV3. Decreased expression of C9ORF72 synergizes DPR toxicity.**

- A Immunoblotting against the HA-tag or the GAPDH of proteins extracted from HEK293 cells transfected for 24 h with 80 G4C2 repeats embedded in the human sense *C9ORF72* sequence fused to a HA-tag in the GA frame and treated or not with MG132 and/or bafilomycin A1.
- B As in (A) but with cells transfected with 100 C4G2 repeats embedded in the human antisense *C9ORF72* sequence fused to a HA-tag in the PG frame.
- C, D Left panel, representative images of immunofluorescence labeling of endogenous P62/SQSTM1 (C) or ubiquitin (D) and the GFP in GT1-7 neuronal cells co-transfected for 24 h with either a control siRNA or a siRNA targeting *C9orf72* mRNA and a construct containing 80 G4C2 repeats embedded in sense *C9ORF72* fused to the GFP in the GA frame. Right panel, quantification of the percent of co-localization of P62 or ubiquitin with polyGA aggregates.
- E Immunofluorescence labeling of M6PR in GT1-7 neuronal cells transfected for 24 h with either a control siRNA or a siRNA targeting *C9orf72* mRNA.
- F Immunofluorescence labeling of EEA1 in GT1-7 neuronal cells transfected for 24 h with either a control siRNA or a siRNA targeting *C9orf72* mRNA.

Data information: Error bars indicate s.e.m. Student's *t*-test, \*\*\**P* < 0.001. *n* = 3 independent transfection. Scale bars, 10  $\mu$ m. Nuclei were counterstained with DAPI.

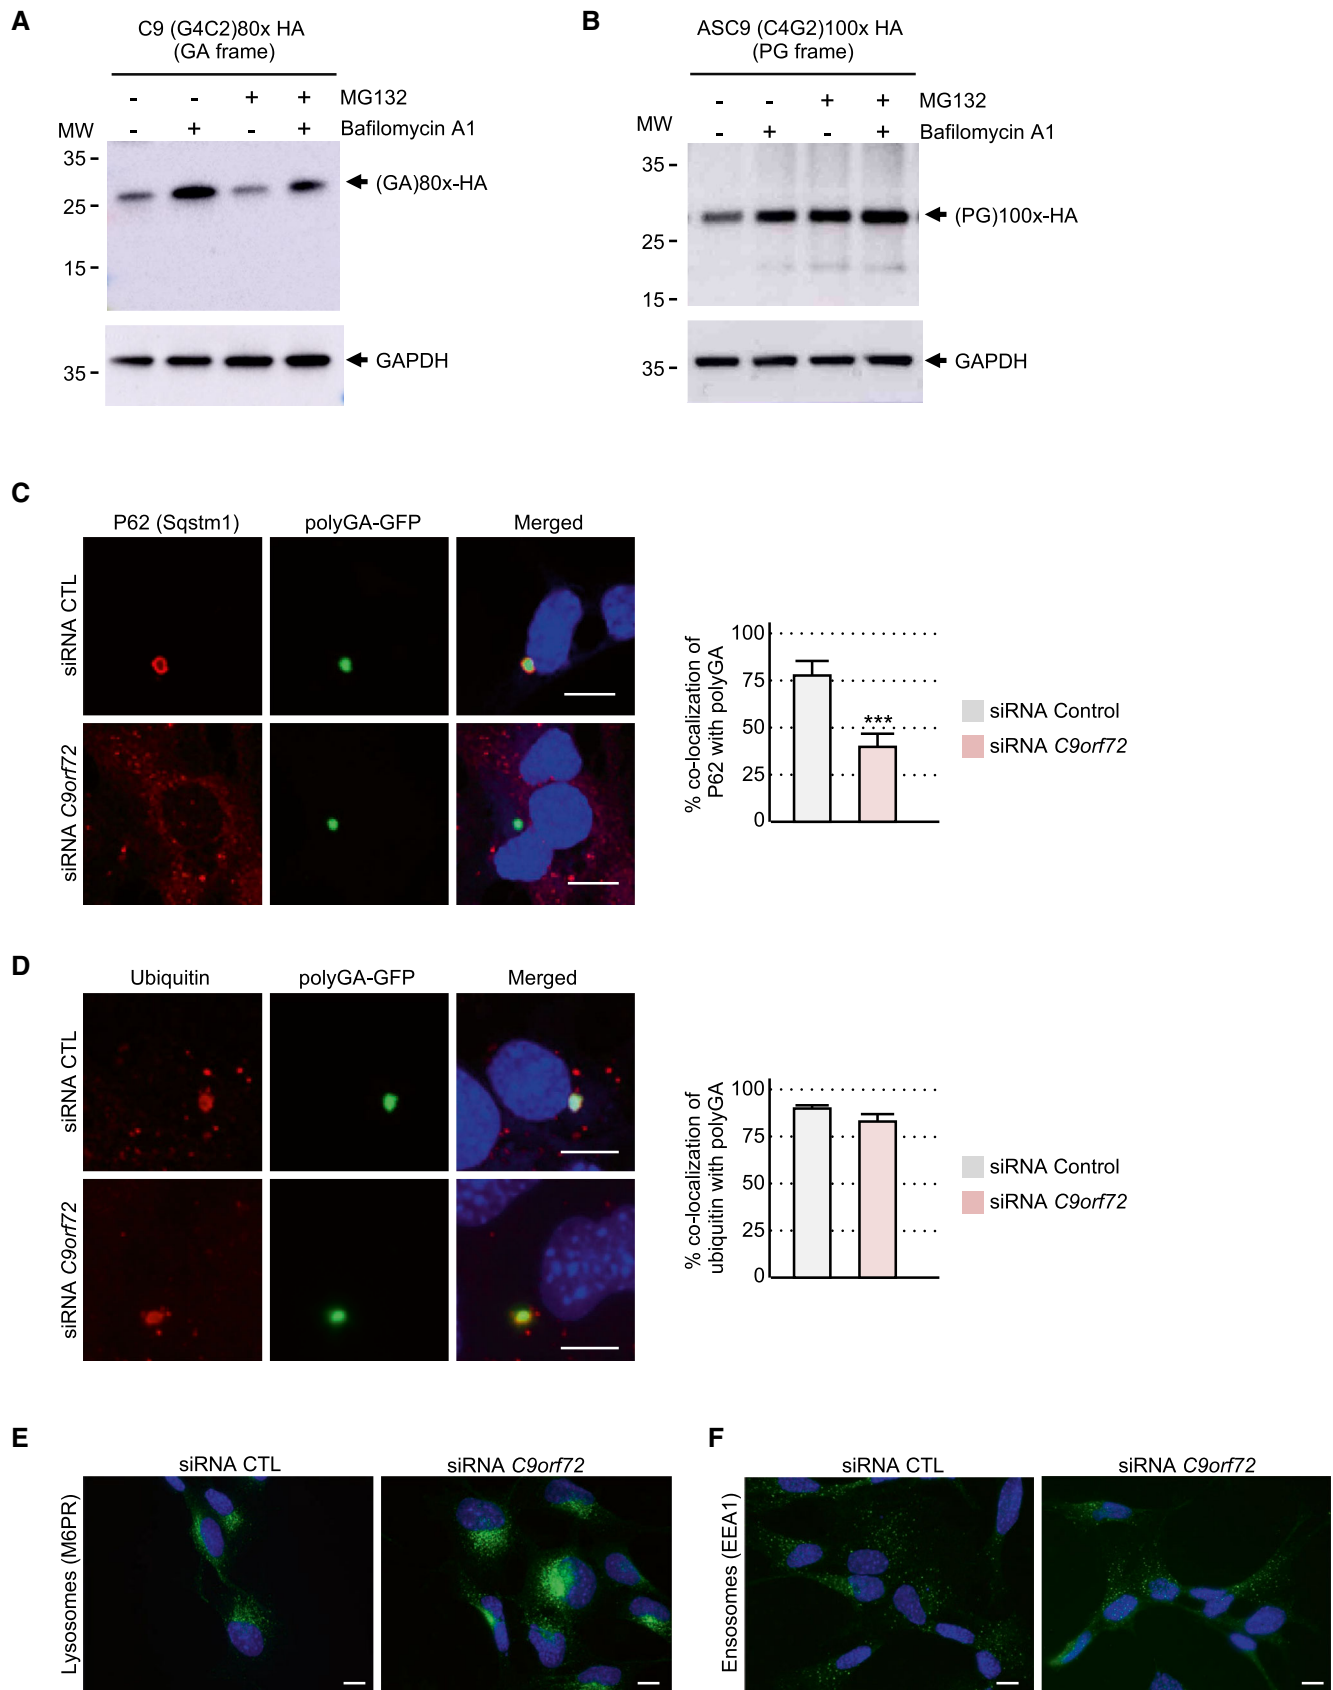

Figure EV3.

**Figure EV4. Promethazine reduces DPR protein accumulation and toxicity.**

- A Left panel, immunoblotting against the GFP or the GAPDH of proteins extracted from HEK293 cells transfected for 24 h with a construct expressing under an artificial ATG start codon 100 GA repeats fused to the GFP (ATG (GA)100× GFP) and treated 15 h with 10 μM of the indicated drug. Right panel, quantification of polyGA expression relative to the GAPDH.
- B Immunoblotting against the GFP or the GAPDH of proteins extracted from HEK293 cells transfected for 24 h with ATG (GA)100× GFP and treated 15 h with 1, 3, or 10 μM of the indicated drug.
- C Left panel, GFP fluorescence of HEK293 cells transfected for 24 h with ATG (GA)100× GFP and treated with 10 μM of the indicated compound. Scale bars, 10 μm. Nuclei were counterstained with DAPI. Right panel, quantification of polyGA aggregates.
- D Cell viability (TO-PRO-3 FACS staining) of GT1-7 neuronal cells treated with 1, 3, or 10 μM of promethazine and co-transfected for 24 h with ATG (GA)100× GFP and either a control siRNA or a siRNA targeting *C9orf72* mRNA.

Data information: Error bars indicate s.e.m. Student's *t*-test, \*\**P* < 0.01, and \*\*\**P* < 0.001. *n* = 5 independent transfection.

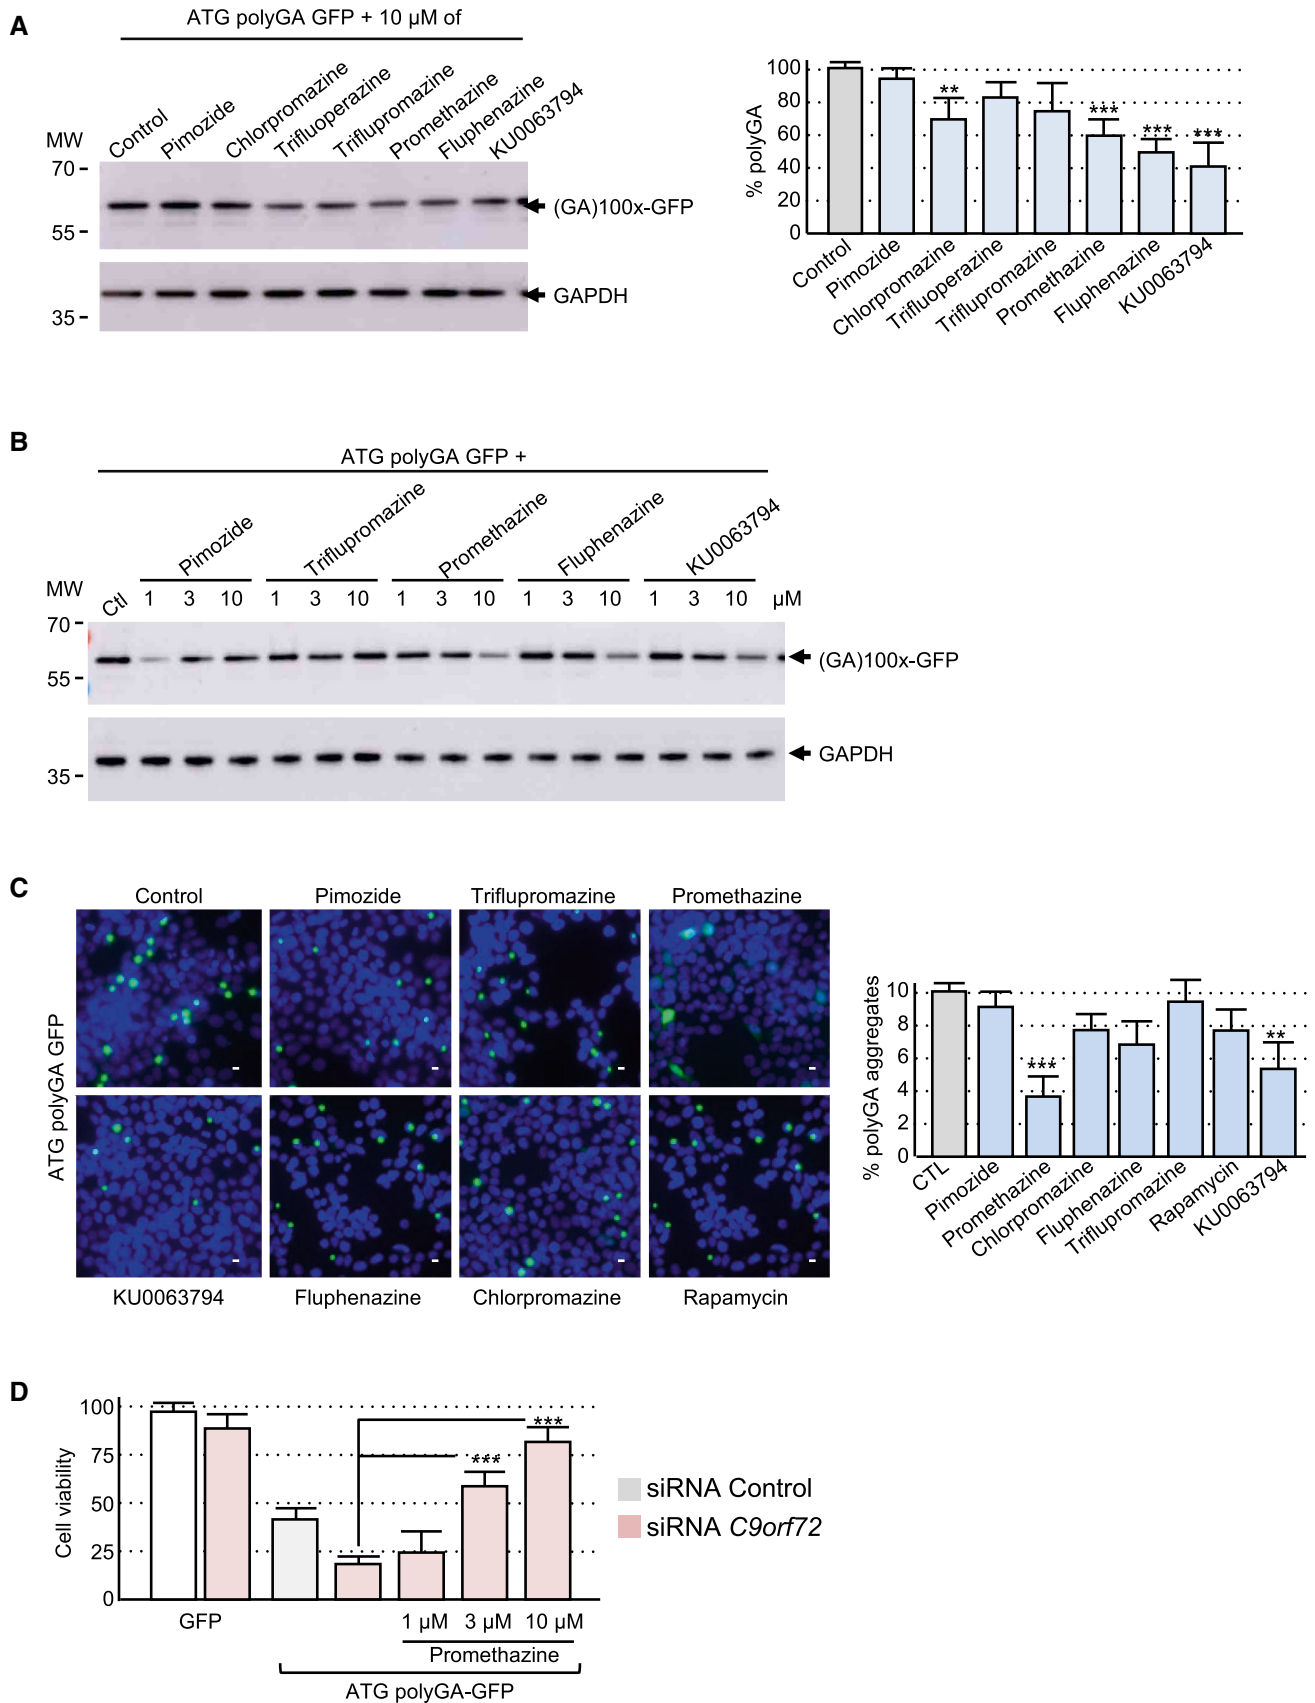

Figure EV4.
